# Supplementary material for: High expression of β-catenin contributes to the crizotinib resistant phenotype in the stem-like cell population in neuroblastoma
Source: PubMed Central journal article supplement (PMC5715105; doi:10.1038/s41598-017-17319-9), 2017-12-04
Supplement: 41598_2017_17319_MOESM1_ESM.pdf [file 41598_2017_17319_MOESM1_ESM.pdf]

# Supplementary Data

## **High expression of $\beta$ -catenin contributes to the crizotinib resistant phenotype in the stem-like cell population in neuroblastoma**

Abdulraheem Alshareef<sup>1,2</sup>, Nidhi Gupta<sup>1</sup>, Hai-Feng Zhang<sup>1</sup>, Chengsheng Wu<sup>1</sup>, Moinul Haque<sup>1</sup>, Raymond Lai<sup>1,3,4\*</sup>

<sup>1</sup>Department of Laboratory Medicine and Pathology, University of Alberta, Edmonton, Alberta, Canada;

<sup>2</sup>Department of Applied Medical Sciences, Taibah University, Almedinah, P.O. Box 41477, Saudi Arabia;

<sup>3</sup>Department of Oncology, University of Alberta, Edmonton, Alberta, Canada;

<sup>4</sup>*DynaLIFE* Medical Laboratories, Edmonton, Alberta, Canada

### **\*To whom correspondence should be addressed:**

Raymond Lai, MD, PhD, Department of Laboratory Medicine and Pathology, Cross Cancer Institute and University of Alberta, 11560 University Avenue, Room 2338, Edmonton, Alberta T6G 1Z2, Canada; E-mail: rlai@ualberta.ca.

# Supplementary Figure 1

Weeks after cell sorting

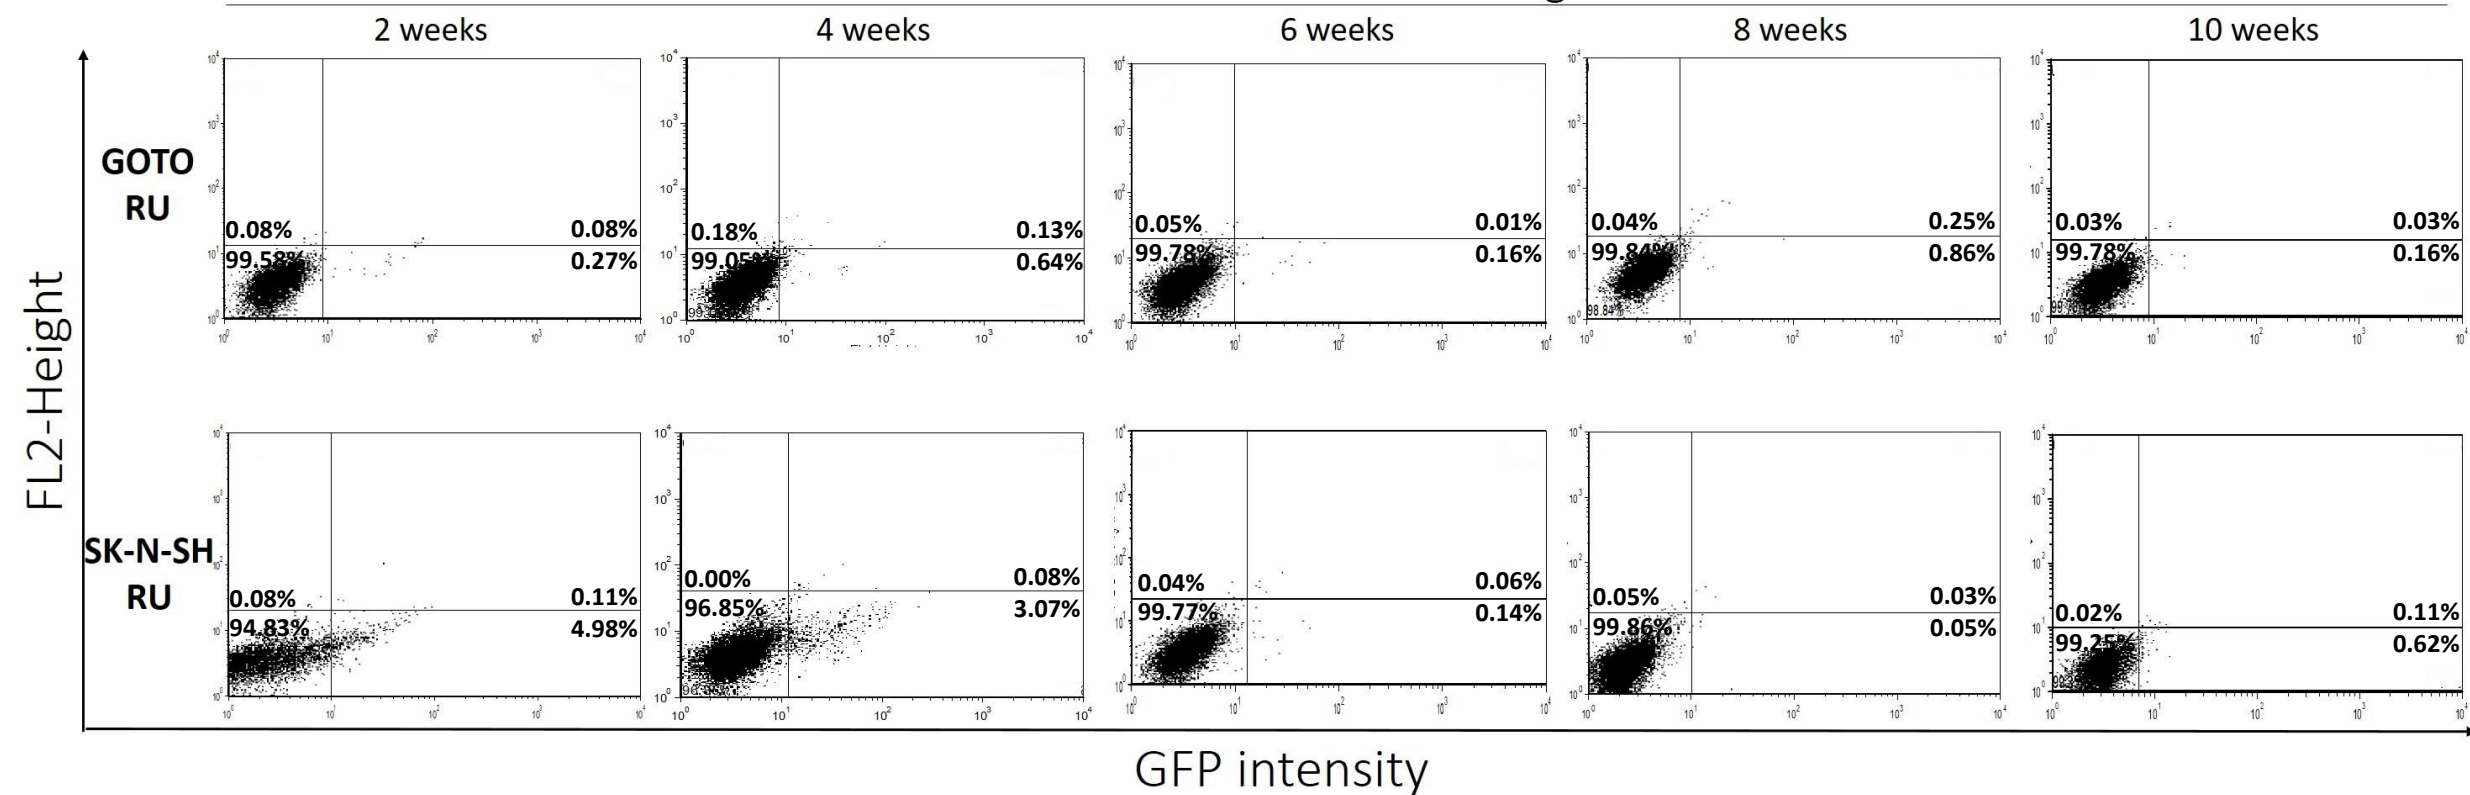

# Supplementary Figure 2

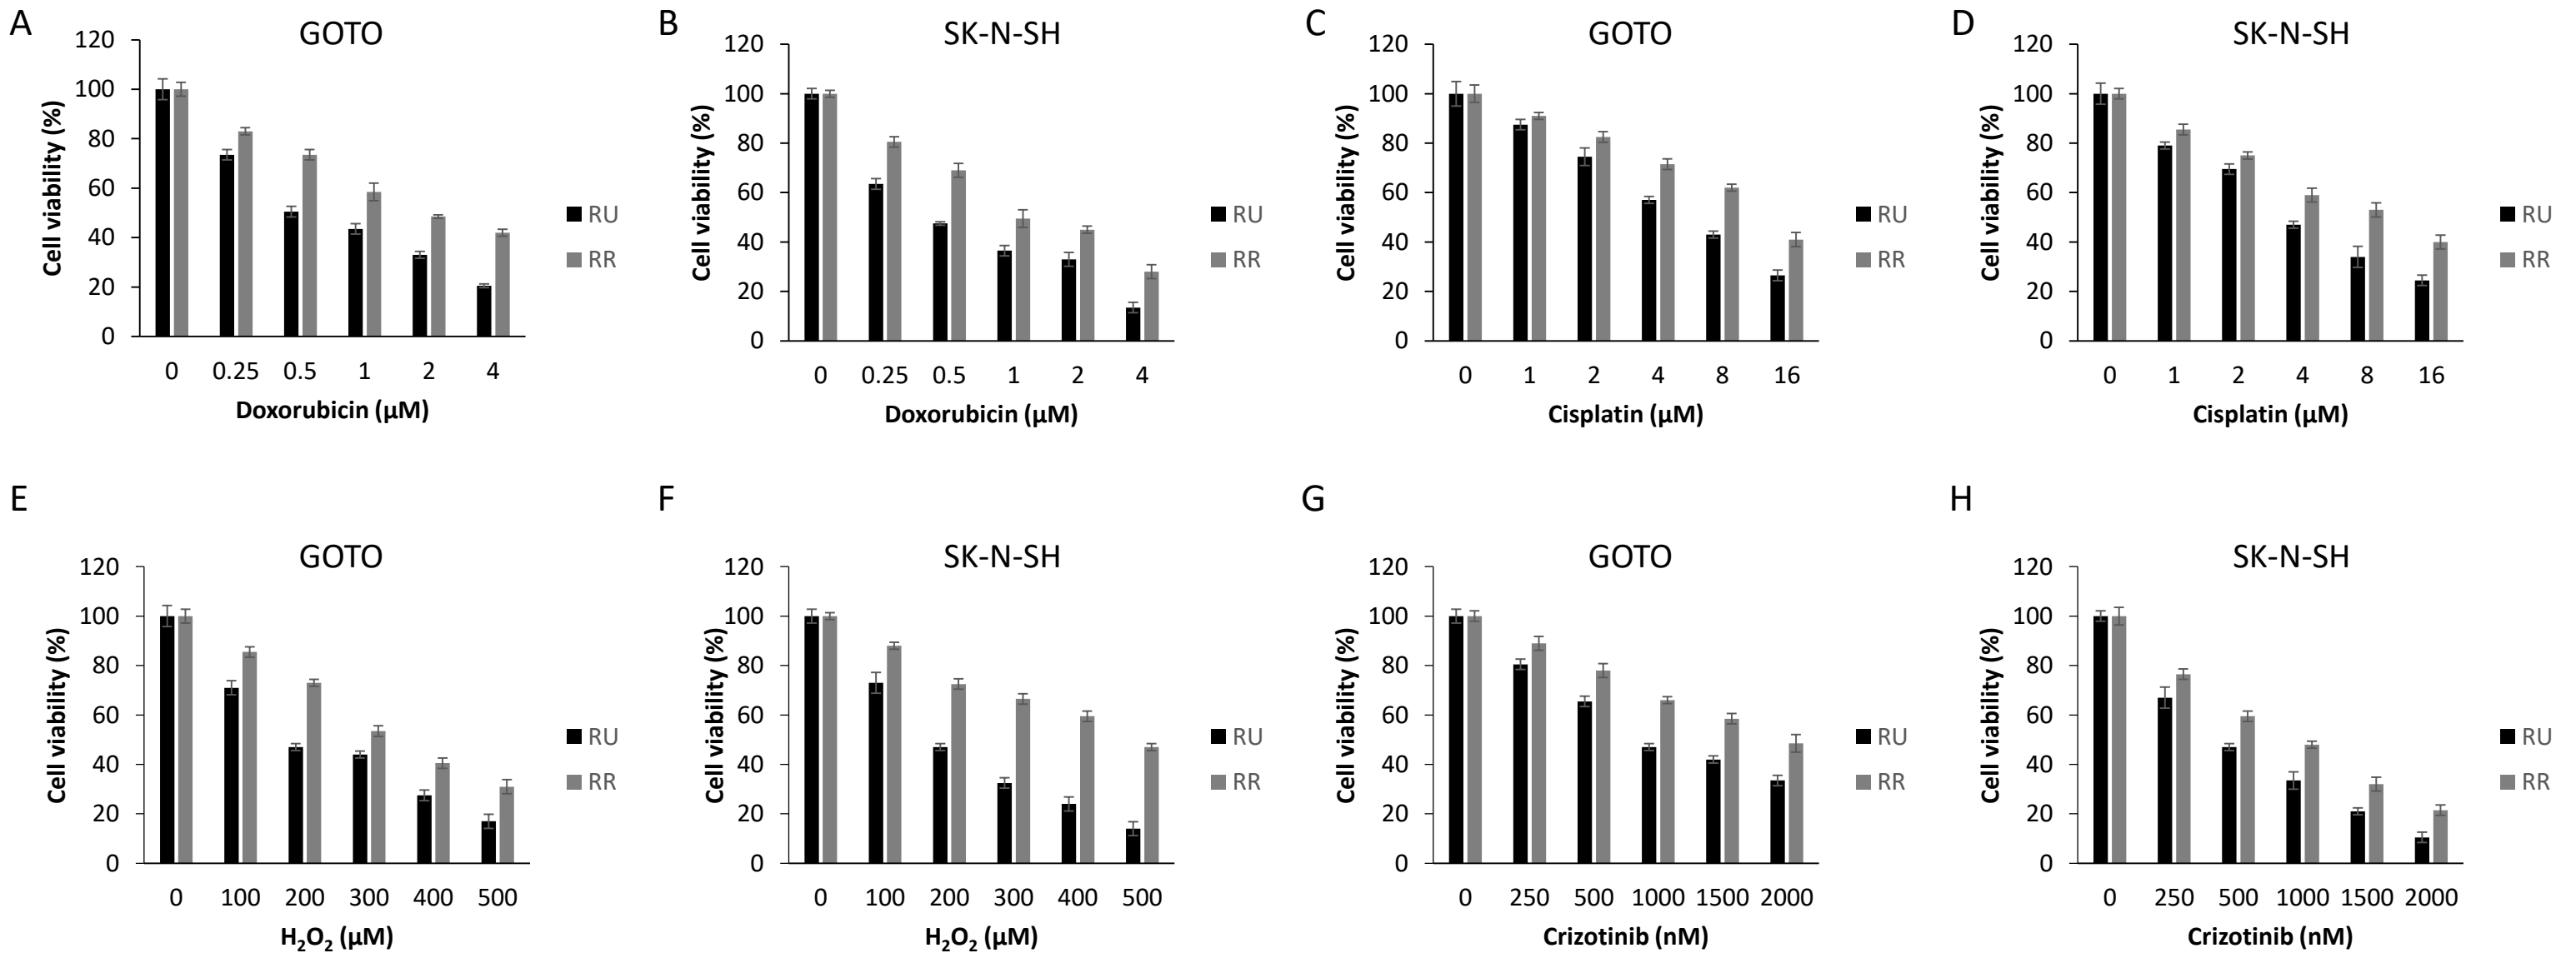

# Supplementary Figure 3

## GOTO

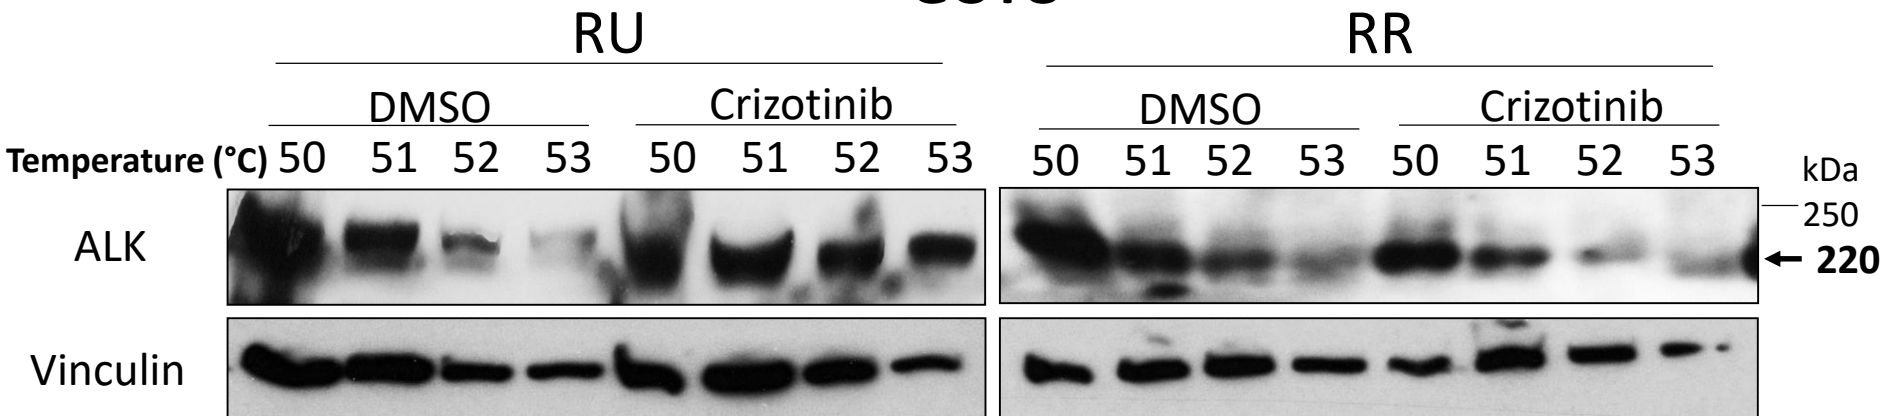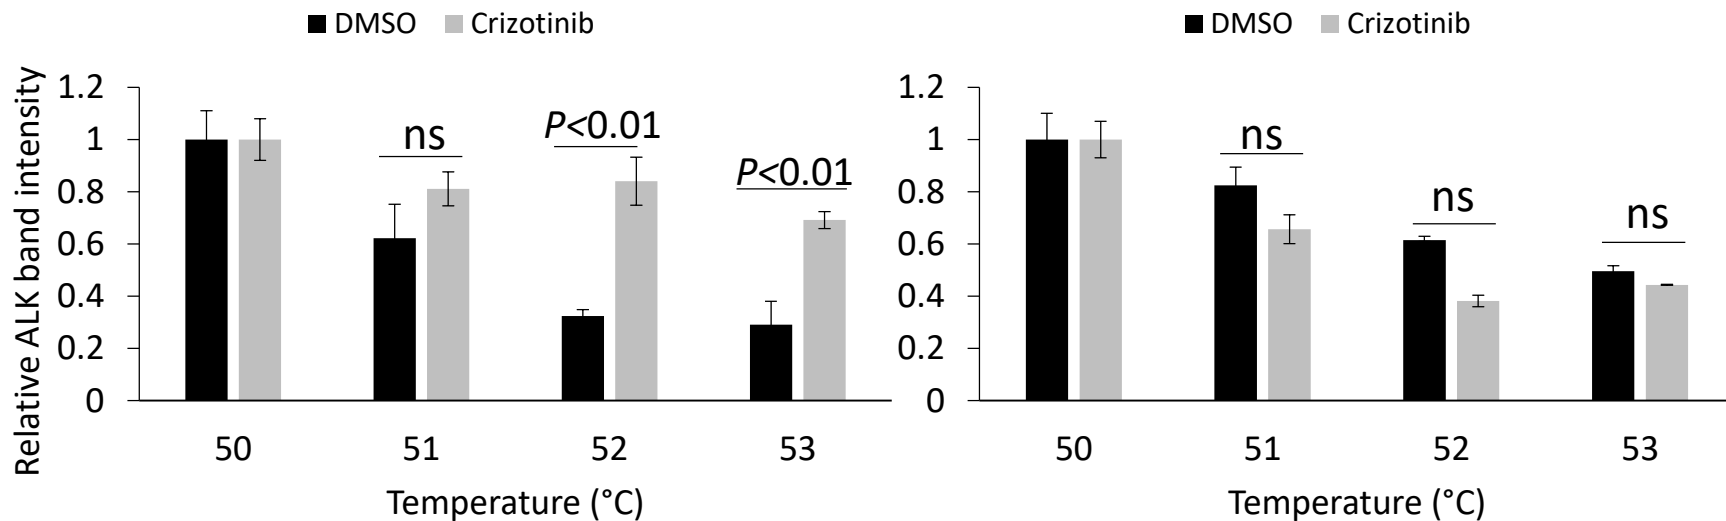

# Supplementary Figure 4

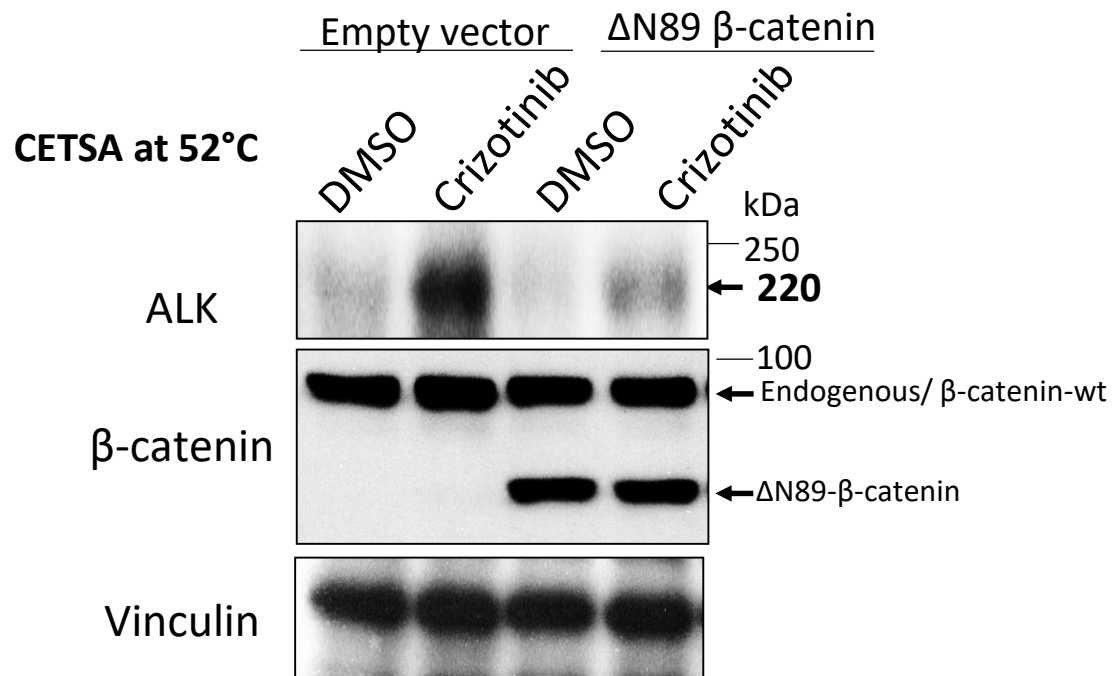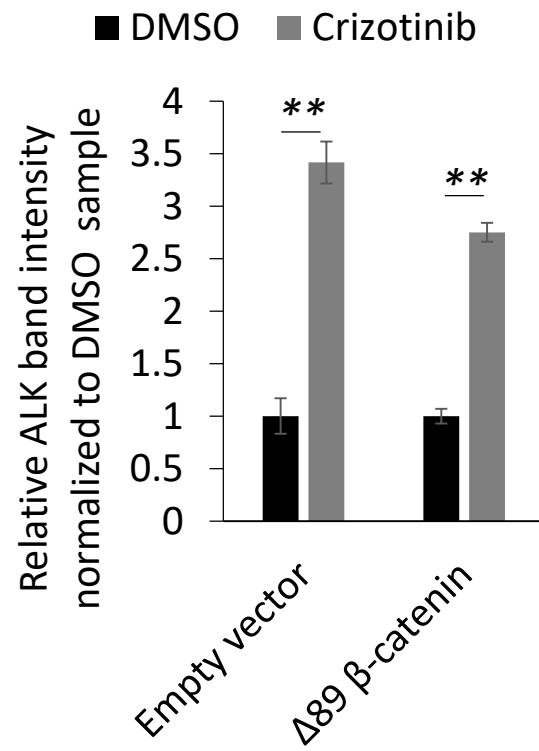

# Supplementary Figure 5

GP293 cells transfected with full-length ALK<sup>wt</sup>

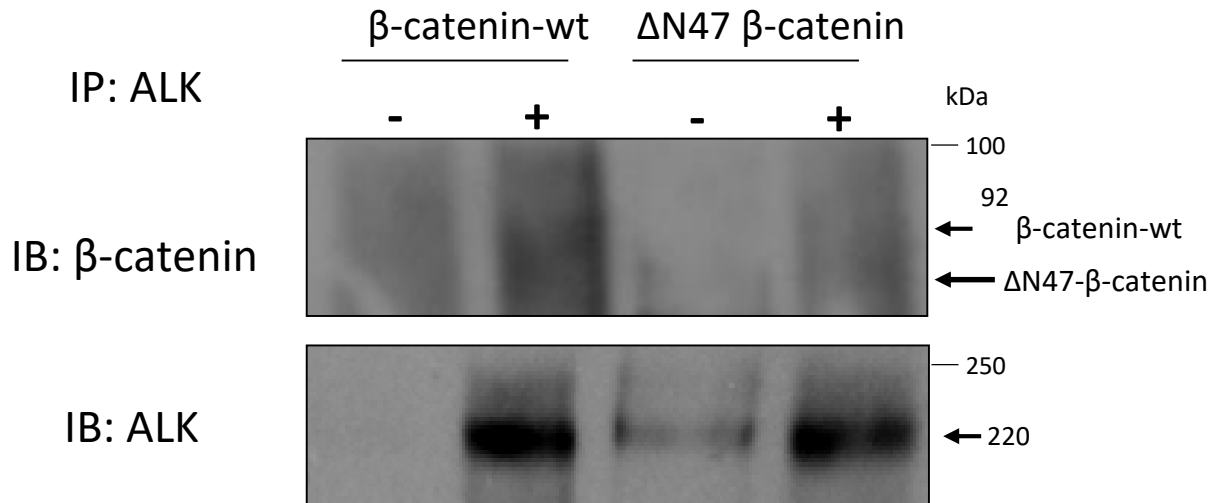

## Supplementary Figure Legends

**Supplementary Figure 1. RU cells do not convert into RR cells.** Flow cytometry analysis was performed to assess GFP expression in purified RU cells derived from GOTO and SK-N-SH. No appreciable emergency of GFP-positive cells was found in both cell lines over 10 weeks.

**Supplementary Figure 2. RR cells are significantly resistant to chemotherapeutic agents, oxidative stress and crizotinib.** Purified RU and RR cells derived from 2 NB cell lines were subjected to two chemotherapeutic agents (doxorubicin and cisplatin) (**A-D**), oxidative stress (i.e. H<sub>2</sub>O<sub>2</sub>) (**E & F**) and crizotinib (**G & H**). The number of viable cells were counted at 72 hours after the treatment. Triplicate experiments were performed and a representative experiment is illustrated.

**Supplementary Figure 3. RR cells derived from GOTO demonstrate no crizotinib—ALK binding.** CETSA was performed to compare crizotinib—ALK binding ability between RU and RR cells. RU and RR cells derived from GOTO were treated with DMSO or 500 nM crizotinib for 6 hours. Representative ALK western blots are shown on the upper panel. Vinculin level was blotted as a loading control. The densitometry quantification data from 3 independent experiments are shown on the lower panel. All data are presented as mean  $\pm$  SD. Student's *t* test was performed.

**Supplementary Figure 4. Enforced  $\Delta$ N89- $\beta$ -catenin maintained crizotinib—ALK binding in SK-N-SH-RU cells.** CETSA was performed to compare crizotinib—ALK binding ability in RU that were transfected with either empty vector or  $\Delta$ N89- $\beta$ -catenin. Cells were treated with DMSO or 500 nM crizotinib for 6 hours. Representative ALK western blots are shown on the left panel.

CETSA assay was performed at 52°C. Vinculin level was blotted as a loading control. All data are presented as mean  $\pm$  SD, \* $P$ <0.05, \*\* $P$ <0.01, Student's  $t$  test.
